# Supplementary material for: Rapid and facile method to prepare oxide precursor solution by using sonochemistry technology for WZTO thin film transistors
Source: Royal Society of Chemistry journal article supplement (doi:10.1039/d0ra05245k), 2020-01-01
Supplement: d0ra05245k1.pdf [file d0ra05245k1.pdf]

## Supporting Information.

# Rapid and Facile Method to Prepare Oxide Precursor Solution by Using Sonochemistry Technology for WZTO Thin Film Transistor

*Yanyu Yuan, Cong Peng, Shibo Yang, Meng Xu, Jiayu Feng, Xifeng Li\* and Jianhua Zhang*

Key Laboratory of Advanced Display and System Applications of Ministry of Education,  
Shanghai University, Shanghai 200072, P. R. China

\* E-mail: [lixifeng@shu.edu.cn](mailto:lixifeng@shu.edu.cn)

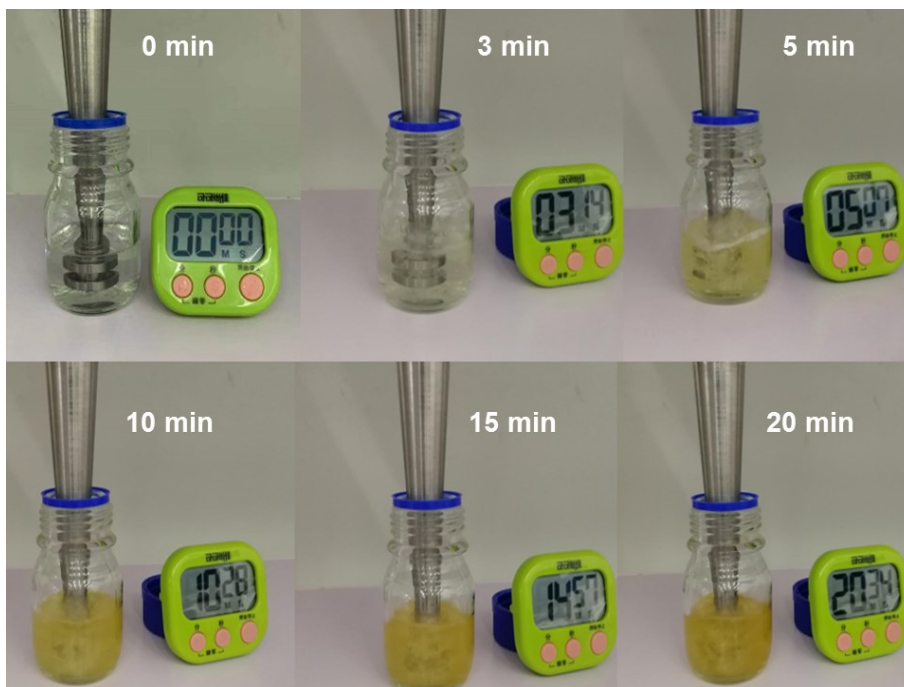

**Fig. S1.** Schematic of ultrasonic system experimental object.

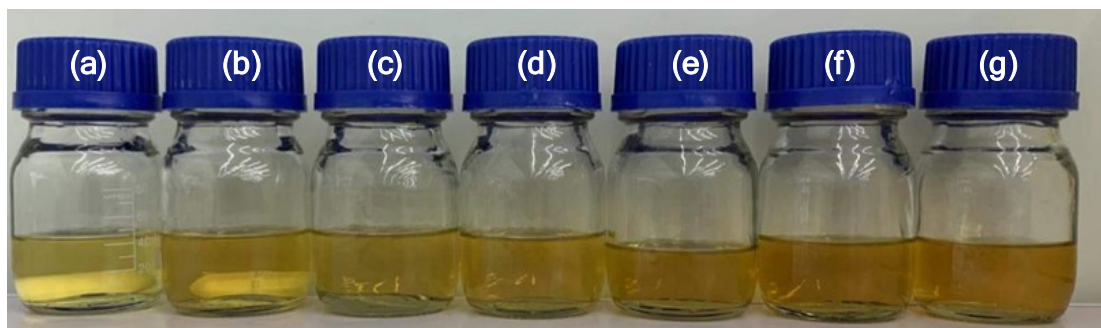

**Fig. S2.** The photograph of WZTO precursor solutions, The color change by different treatment ways: (a) water bath treatment for 1h, (b) water bath treatment for 3h, (c) sonochemical treatment for 3 min, (d) sonochemical treatment for 5 min, (e) sonochemical treatment for 10 min, (f) sonochemical treatment for 15 min, and (g) sonochemical treatment for 20 min.

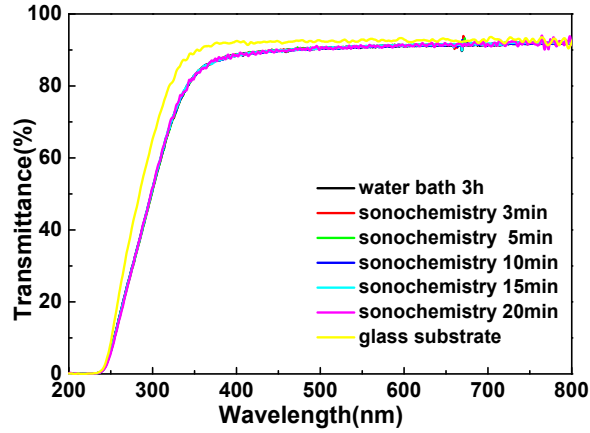

**Fig. S3.** Optical transmission image of the various WZTO samples obtained by different methods.

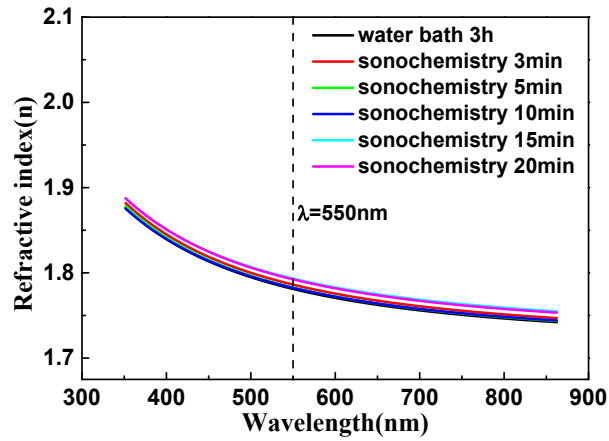

**Fig. S4.** Refractive index image of the various WZTO samples obtained by different methods.

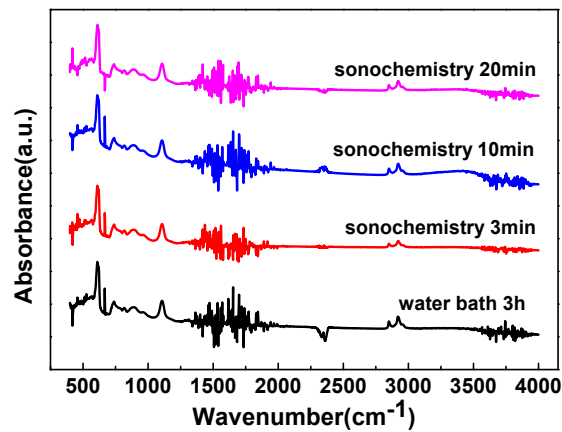

**Fig. S5.** FTIR spectra of the various WZTO samples obtained by different methods.
